# Supplementary material for: Sustainable, upscaled synthesis of pinene-derived (meth)acrylates and their application as high Tg monomers in styrene/acrylic-based bioderived copolymer coatings
Source: Royal Society of Chemistry journal article supplement (doi:10.1039/d4su00210e), 2024-01-01
Supplement: d4su00210e1.pdf [file d4su00210e1.pdf]

## Supporting Information

### Sustainable, Upscaled Synthesis of Pinene-Derived (Meth)acrylates and their Application as High $T_g$ Monomers in Styrene/Acrylic-Based Bioderived Copolymer Coatings

María Pin-Nó,<sup>a,c</sup> Philippa L. Jacob,<sup>a</sup> Vincenzo Taresco,<sup>a</sup> Maud Kastelijm,<sup>b</sup> Tijs Nabuurs,<sup>b</sup> Chandres Surti,<sup>c</sup> John Bilney,<sup>c</sup> John Daly,<sup>c</sup> Daniel J. Keddie,<sup>a</sup> Steven M. Howdle,<sup>\*a</sup> Robert A. Stockman<sup>\*a</sup>

<sup>a</sup>School of Chemistry, University of Nottingham, University Park, Nottingham, NG7 2RD, UK

Email: robert.stockman@nottingham.ac.uk; steve.howdle@nottingham.ac.uk

<sup>b</sup>Covestro (Netherlands) BV, Sluisweg 12, 5145PE, Waalwijk, The Netherlands

<sup>c</sup>Cornelius Specialties Limited, 5c Rookwood Way, Haverhill, Suffolk, CB9 8PB, UK

**Table S1:** Experimental details for synthesis of copolymers **P1-P6**

| Entry <sup>a</sup> | Sample label | M1 | M1 moles | M2             | M2 moles | [M1]/[M2]/[MAA] (molar ratio) |
|--------------------|--------------|----|----------|----------------|----------|-------------------------------|
| 1                  | <b>P1</b>    | BA | 2.55     | PA <b>1</b>    | 0.87     | 2.93/1.00/0.14                |
| 2                  | <b>P2</b>    | BA | 2.55     | PMA <b>2</b>   | 0.82     | 3.12/1.00/0.15                |
| 3                  | <b>P3</b>    | BA | 2.55     | iBoMA <b>3</b> | 0.82     | 3.12/1.00/0.15                |
| 4                  | <b>P4</b>    | St | 3.13     | PA <b>1</b>    | 0.87     | 3.60/1.00/0.14                |
| 5                  | <b>P5</b>    | St | 3.13     | PMA <b>2</b>   | 0.82     | 3.84/1.00/0.15                |
| 6                  | <b>P6</b>    | St | 3.13     | iBoMA <b>3</b> | 0.82     | 3.84/1.00/0.15                |

<sup>a</sup>Monomer feed ratios (wt %): M1 = 63% (326.3 g); M2 = 35% (181.2 g); MAA = 2 % (10.4 g); total reaction mass = 1200 g.

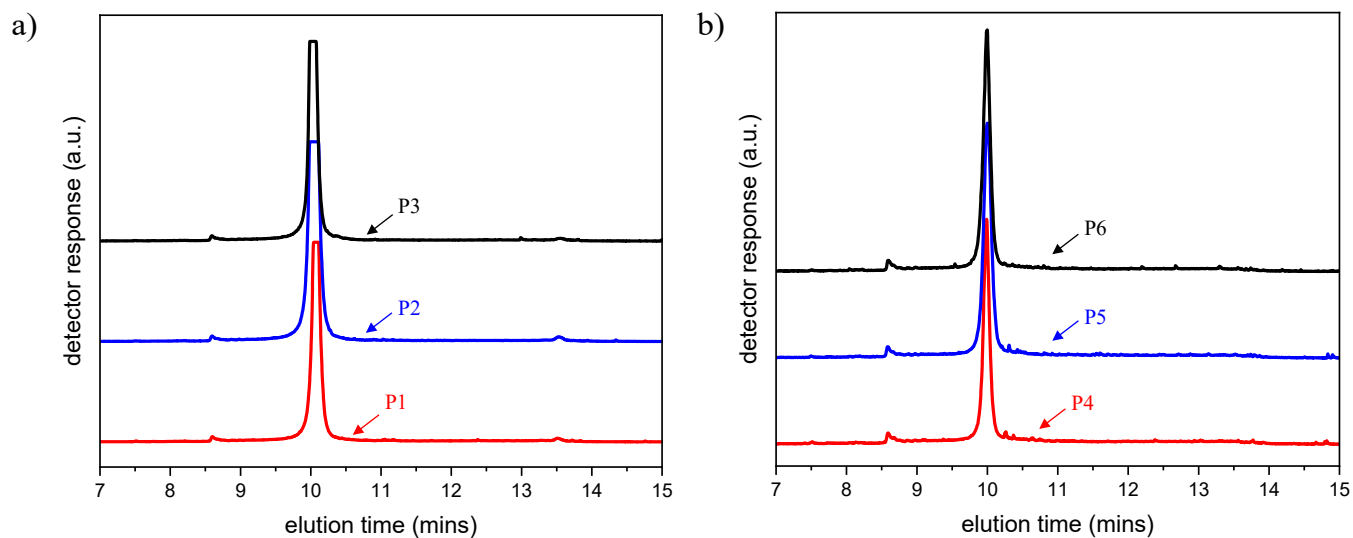

**Figure S1:** Gradient polymer elution chromatograms of (a) PBA-based copolymers (**P1-P3**), and (b) PSt-based copolymers (**P4-P6**) prepared by starved feed emulsion radical copolymerization with PA **1** (red), PMA **2** (blue) and iBoMA **3** (black). **P1-P6** refer to the sample labels given in Table 1.

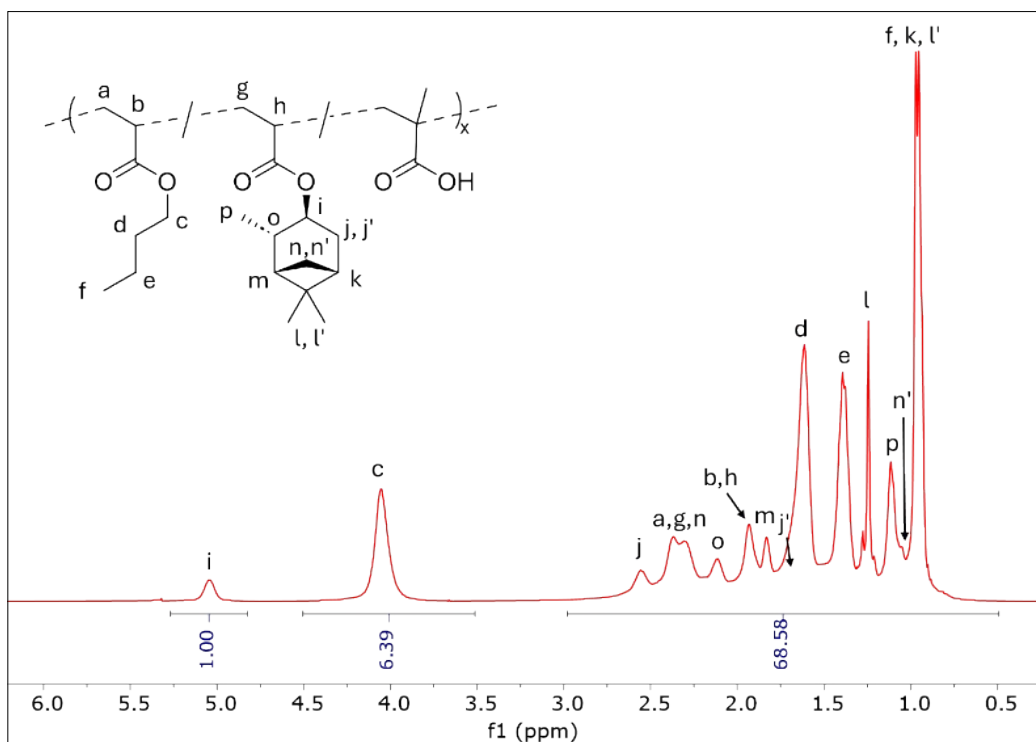

**Figure S2:**  $^1\text{H}$  NMR spectrum of poly[(*n*-butyl acrylate)-*co*-(3-pinanyl acrylate)-*co*-(methacrylic acid)] (**P1**). Note, MAA signal assignments are omitted for clarity.

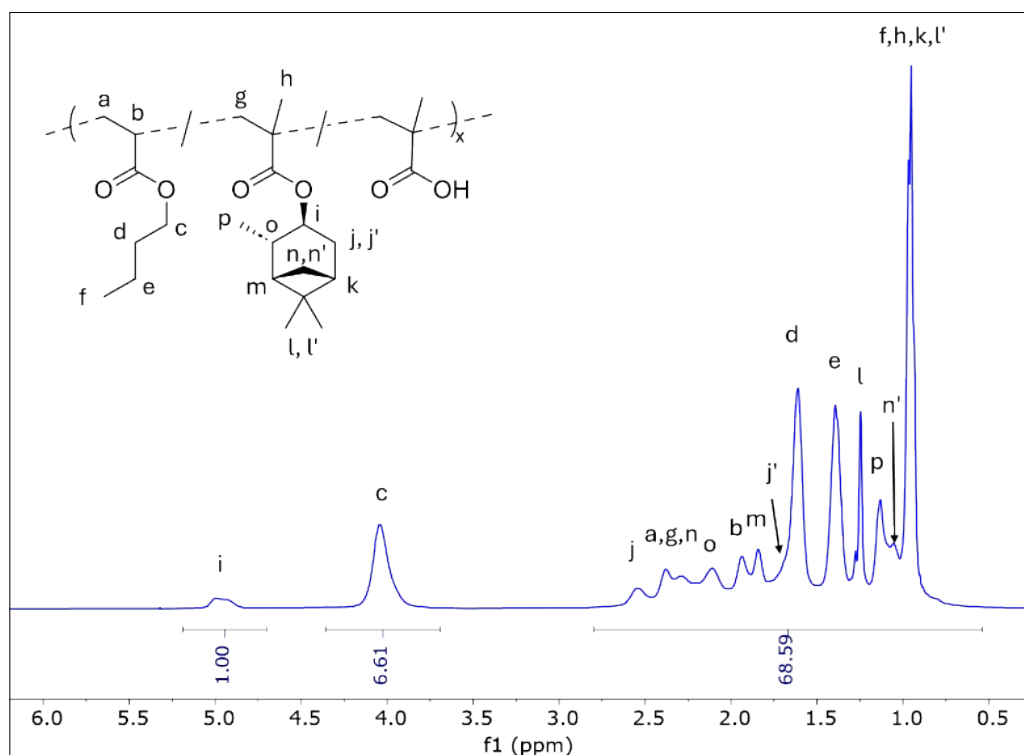

**Figure S3:**  $^1\text{H}$  NMR spectrum of poly[(*n*-butyl acrylate)-*co*-(3-pinanyl methacrylate)-*co*-(methacrylic acid)] (**P2**). Note, MAA signal assignments are omitted for clarity.

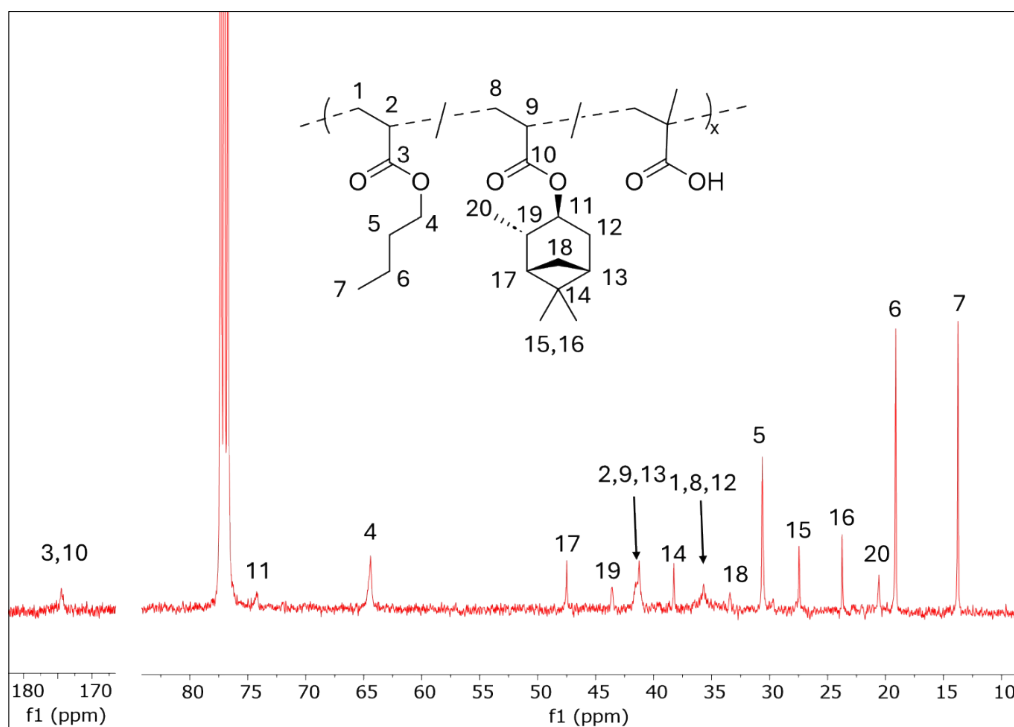

**Figure S4:**  $^{13}\text{C}$  NMR spectrum of poly[(*n*-butyl acrylate)-*co*-(3-pinanyl acrylate)-*co*-(methacrylic acid)] (P1). Note, MAA signals assignments are omitted for clarity.

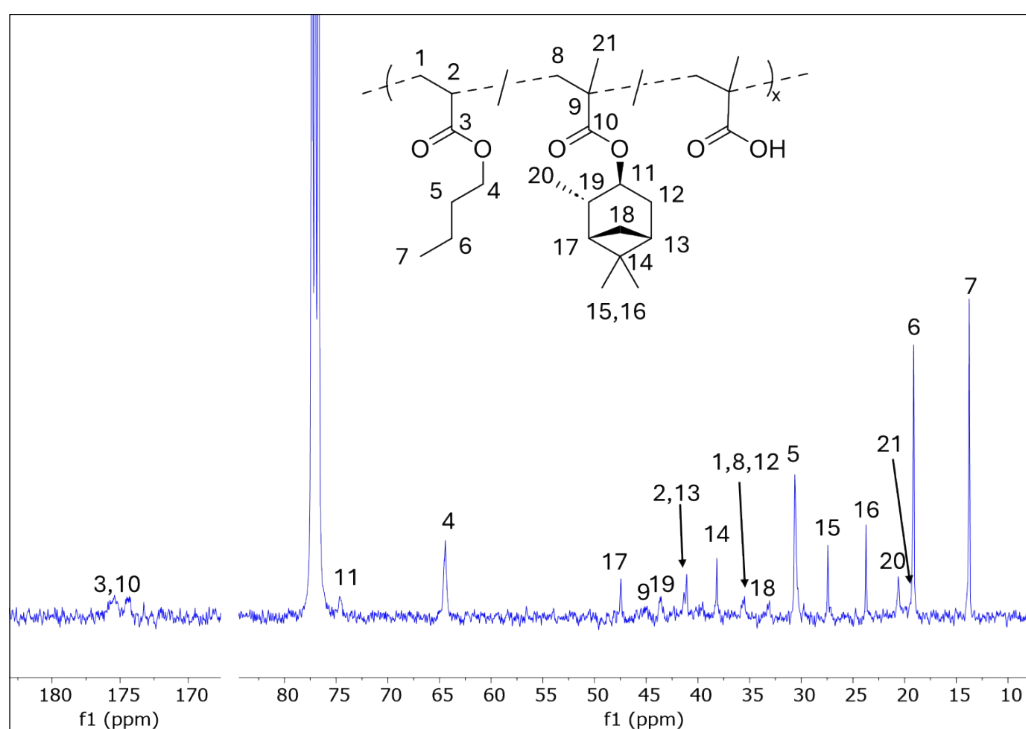

**Figure S5:**  $^{13}\text{C}$  NMR spectrum of poly[(*n*-butyl acrylate)-*co*-(3-pinanyl methacrylate)-*co*-(methacrylic acid)] (P2). Note, MAA signals assignments are omitted for clarity.
